# Supplementary material
Source: publisher figshare collection journal article supplement (https://future-science-group.figshare.com/ndownloader/files/35260249)
Supplement: Supplementary file 1 [file 35260249]

**Supplementary Table 2.** Summary of locoregional treatments after first-line chemotherapy

| Number of patients | First-line treatment regimens | Locoregional treatment* |
| --- | --- | --- |
| 3 | FFN | Radiotherapy |
| 1 | FFN | Radiofrequency ablation (RFA) |
| 4 | NabGem | Radiotherapy |
| 1 | NabGem | Irreversibile electroporation (IRE) |

*All locoregional treatments targeting primary pancreatic tumor.
